# Supplementary material for: Effects of judo-specific intermittent training on lower-limb impulse and specific performance in judokas
Source: PeerJ. 2025 Jun 4;13:e19491. doi: 10.7717/peerj.19491 (PMC12145089; doi:10.7717/peerj.19491)
Supplement: Supplemental Information 1 [file peerj-13-19491-s001.xlsx]

## Sheet: CMJ
G	RFD_pre		RFD_post		RFP_pre		RFP_post		JH_pre		JH_post		TTT_pre		TTT_post		RSI_pre		RSI_post
1	5.15		6.7		11.4		13.25		0.39		0.38		0.65		0.59		0.6		0.65
1	7.38		8.63		14.27		17.2		0.42		0.47		0.67		0.65		0.63		0.72
1	5.07		6.35		12.83		12.81		0.31		0.39		0.69		0.69		0.45		0.56
1	6.96		8.09		15.97		16.76		0.36		0.37		0.66		0.67		0.55		0.56
1	7.88		8.93		16.79		16.78		0.48		0.48		0.65		0.65		0.74		0.73
1	7.93		7.28		15.74		15.23		0.41		0.4		0.62		0.65		0.66		0.62
1	5.35		7.3		15.46		17.49		0.41		0.44		0.68		0.63		0.61		0.7
1	5.34		7.06		12.71		14.7		0.33		0.34		0.68		0.58		0.48		0.59
1	7.35		7.06		12.84		16.69		0.29		0.36		0.74		0.63		0.39		0.58
1	5.89	6.43	5.16	7.256	12.73	14.074	12.98	15.389	0.36	0.376	0.34	0.397	0.7	0.674	0.71	0.645	0.51	0.562	0.48	0.619
2	8.91		8.98		15.01		16.08		0.35		0.43		0.64		0.67		0.54		0.64
2	4.8		4.72		15.5		12.31		0.32		0.45		0.67		0.76		0.48		0.59
2	4.69		5.24		10.72		11.71		0.32		0.36		0.78		0.74		0.41		0.49
2	6.09		6.31		14.52		16.19		0.33		0.4		0.69		0.76		0.48		0.53
2	9.23		9.76		16.5		17.67		0.41		0.46		0.69		0.61		0.59		0.75
2	6.35		6.72		13.12		14.51		0.36		0.45		0.68		0.67		0.53		0.67
2	4.66		4.67		13.25		13.24		0.23		0.25		0.65		0.66		0.35		0.38
2	6.05		6.01		12.4		14.03		0.35		0.43		0.73		0.7		0.48		0.61
2	5.55		7.33		12.58		17.59		0.55		0.44		0.72		0.57		0.76		0.77
2	5.06	6.139	5.23	6.497	12.76	13.636	13.33	14.666	0.3	0.352	0.36	0.403	0.73	0.698	0.69	0.683	0.41	0.503	0.52	0.595
3	9.06		9.24		18.68		17.64		0.39		0.46		0.71		0.73		0.63		0.69
3	7.57		4.11		10.31		14.26		0.31		0.3		0.68		0.79		0.45		0.55
3	4.31		3.87		11.54		13.25		0.24		0.22		0.65		0.7		0.62		0.58
3	7.78		7.92		16.2		15.27		0.43		0.47		0.68		0.7		0.74		0.73
3	7.36		6.71		13.87		15.73		0.41		0.43		0.69		0.74		0.66		0.59
3	4.81		4.72		11.68		12.19		0.37		0.36		0.8		0.77		0.61		0.68
3	7.78		7.42		15.61		16.56		0.28		0.29		0.55		0.61		0.36		0.43
3	7.25		7.09		16.03		15.23		0.47		0.52		0.73		0.74		0.48		0.56
3	2.71		4.75		9.32		10.14		0.3		0.29		0.87		0.73		0.39		0.55
3	7.66		10.57		17.41		17.15		0.33		0.37		0.63		0.61		0.33		0.29
		6.629		6.64		14.065		14.742		0.353		0.371		0.699		0.712		0.527		0.565
		tori	12.846				9.34347				5.58511				-4.30267				10.1423
		uke	5.83157				7.55353				14.4886				-2.149				18.2903
		con	0.165938				4.81337				5.09915				1.8598				7.21063

## Sheet: SJFT
G	pre_15t		post_15t		pre_30t		post_30t		pre_301t		post_301t		pre_tot		post_tot		pre_hr		post_hr		pre_1minhr		post_1minhr		pre_sjfi		post_sjfi
1	6		7		11		13		11		14		28		34		172		163		146		128		11.36		8.56
1	6		7		10		11		12		13		28		31		170		168		150		147		11.43		10.16
1	6		7		12		12		10		12		28		31		175		159		141		131		11.29		9.35
1	6		7		10		13		10		13		26		33		161		162		141		125		11.62		8.7
1	7		7		13		14		12		14		32		35		175		160		169		119		10.75		7.97
1	7		6		11		11		12		11		30		28		176		171		153		122		10.97		10.46
1	6		7		10		11		8		10		24		28		180		181		155		161		13.96		12.21
1	6		6		11		11		10		11		27		28		181		176		171		158		13.04		11.93
1	7		7		12		12		11		10		30		29		179		169		156		151		11.17		11.03
1	5	6.2	7	6.8	10	11.1111	12	12	8	10.4	12	12	23	27.6	31	30.8	169	173.8	171	168	138	152	144	138.6	13.35	11.894	10.16	10.053
2	6		6		10		11		10		11		28		28		165		173		152		141		12.19		11.21
2	6		6		12		12		10		11		28		29		195		177		172		130		13.11		10.59
2	6		6		11		11		9		10		28		27		172		157		145		133		12.19		10.74
2	6		6		11		11		11		11		26		28		183		175		140		134		11.54		11.04
2	7		7		12		12		11		11		32		30		165		162		146		145		10.37		10.23
2	6		6		13		13		12		10		30		29		176		163		165		147		11		10.69
2	6		6		11		10		11		11		24		27		178		170		166		154		12.29		12
2	5		5		12		12		11		12		27		29		181		177		168		164		12.46		11.76
2	6		6		12		12		11		12		30		30		170		174		151		159		11.07		11.1
2	5	5.9	5	5.9	7	11.5556	8	11.2	10	10.6	10	10.9	23	27.6	23	28	176	176.1	171	169.9	158	156.3	154	146.1	15.18	12.14	14.13	11.349
3	6		6		10		11		11		11		27		28		183		180		169		155		13.04		11.96
3	6		7		12		12		10		10		28		29		179		179		179		179		12.79		12.34
3	6		6		11		11		11		11		28		28		177		178		166		170		12.25		12.43
3	6		6		10		10		12		12		28		28		175		178		153		161		11.71		12.11
3	7		7		12		12		11		12		30		31		184		180		157		165		11.37		11.13
3	6		3		11		11		11		11		28		25		186		182		170		165		12.71		13.88
3	5		6		10		10		11		10		26		26		187		179		171		161		13.77		13.08
3	6		7		12		11		11		10		29		28		189		179		175		156		12.55		11.96
3	6		6		10		10		9		9		25		25		176		178		156		145		13.28		12.92
3	5	5.9	6	6	10	10.8889	11	10.9	9	10.6	10	10.6	24	27.3	27	27.5	180	181.6	175	178.8	168	166.4	153	161	14.5	12.797	12.15	12.396
		tori	9.67742				0.08				15.3846				11.5942				-3.33717				-9.66811				-15.4784
		uke	0				-3.07692				2.83019				1.44928				-3.52073				-6.52591				-6.51565
		con	1.69492				0.102041				0				0.732601				-1.54185				-3.24519				-3.13355

## Sheet: INBODY
G	Aage	hight_pre	BM_pre		BM_post		PBF_pre		PBF_post		SMM_pre		SMM_post		G_pre		G_post
1	29	167	66.6		66.5		26.5		25.7		27.2		27.6		32.13		34.67
1	21	167	63.2		62.6		11.9		11.3		31.9		31.6		51.2		46.63
1	20	158	85.9		59.2		17.3		10.7		40.6		29.9		61.87		49.8
1	21	175	65.2		82.9		9.7		16.5		33.6		39.7		48.37		45.07
1	21	166	77.4		63.9		19.3		8.4		35.2		33.7		51.87		47.37
1	20	170	86		79.1		16.4		19.4		41.7		36.2		54.1		47.83
1	20	166	59.5		87.5		12.1		17		29.5		42.1		47.93		49.97
1	18	174	122.8		66.8		32.9		29.9		46.9		26.4		50.23		50.13
1	17	179	68		68		17.5		17.5		31.6		31.6		36.1		29.27
1	21	178	70		123.2		31.5		32.3		27.1		47.8		33.43		37.6
2	37	167	85.5	76.46	64.2	75.97	28.8	19.51	14.8	18.87	31.2	34.53	31.2	34.66	42.8	46.723	39.03	43.834
2	22	167	80.3		59.9		10.5		14.1		29.2		29.2		56.17		57.07
2	19	158	67		89.9		14.6		19.5		41.1		41.1		48.17		44.77
2	20	175	89.2		62.3		18.6		12.4		31		31		58.93		57.9
2	20	166	60.7		77		12		10.2		39.8		39.8		46.53		46.2
2	19	170	61.7		79.1		13.7		16.2		37.6		37.6		44.33		45
2	18	166	79.3		86.3		17.4		29.9		34.6		34.6		55.27		57.03
2	18	174	129.6		67.9		37.3		15.7		32.4		32.4		54.37		56.77
2	18	179	67.6		67.6		10.9		10.9		34.4		34.4		48.37		49.73
2	30	178	67.3		127.9		10.9		36		34.1		47.3		54.43		48.37
3	22	175	104.6	78.82	64.3	78.21	33.6	17.47	16.9	17.97	40.2	34.54	30.2	35.86	39.03	50.937	57.67	50.187
3	21	178	63.2		59.7		11.9		25.7		31.9		24.5		57.07		45.13
3	21	166	79.6		85.5		12.7		28.8		40		34.8		44.77		64.37
3	20	173	69.3		63.2		11.4		11.9		35.1		31.9		57.9		48.4
3	18	181	84.1		79.6		24		12.7		36.7		40		46.2		47.07
3	21	180	70.8		84.1		29		24		28.1		36.7		45		31.47
3	21	169	59.7		90.1		25.7		33.7		24.5		33.8		57.03		41.97
3	19	169	90.1		69.3		33.7		11.4		33.8		35.1		56.77		41.8
3	18	160	61.8		70.8		14.9		29		29.8		28.1		49.73		42.17
3	19	170	74.6		104.6		24.5		33.6		32.2		40.2		48.37		25.63
				75.78		77.12		22.14		22.77		33.23		33.53		50.187		44.568
				tori	-0.640858				-3.28037				0.376484				-6.18325
				uke	-0.773915				2.86205				3.82166				-1.47241
				con	1.76828				2.84553				0.902799				-11.1961
